# Supplementary material for: Organotemplate-free hydrothermal synthesis of an aluminophosphate molecular sieve with AEN zeotype topology and properties of its derivatives
Source: Royal Society of Chemistry journal article supplement (doi:10.1039/c4cc06319h), 2014-10-17
Supplement: c4cc06319h1.pdf [file c4cc06319h1.pdf]

**Supplementary Material for:**

**Organotemplate-free Hydrothermal Synthesis of  
Aluminophosphate Molecular Sieve with AEN-zeotype  
Topology and Properties of Its Derivatives**

Yanyan Wang, Yanjun Sun, Ying Mu, Chuanqi Zhang, Jiyang Li\* and Jihong Yu\*

State Key Laboratory of Inorganic Synthesis and Preparative Chemistry, College of Chemistry,

Jilin University, Changchun 130012, P. R. China. Fax: (+86) 431-85168608; E-mail:

lijiyang@jlu.edu.cn; jihong@jlu.edu.cn

## Experimental section

The reagents and solvents employed in the synthesis were commercially available and used as received without further purification.

**Synthesis of JU93.** Organotemplate-free synthesis of JU93 was carried out in the hydrothermal reaction system of  $\text{Al}_2\text{O}_3$ - $\text{P}_2\text{O}_5$ - $\text{Na}_2\text{O}$ - $\text{H}_2\text{O}$ . Typically, aluminum triisopropoxide was dispersed in a solution of orthophosphoric acid (85 wt%) in water under vigorous stirring at room temperature. 5M NaOH solution was added to this mixture giving the pH value of about 5. After stirring for one hour, a homogeneous gel with an overall molar composition of  $1.0\text{Al}_2\text{O}_3$ :  $4.5$ - $5.2\text{P}_2\text{O}_5$ :  $3.5$ - $4.1\text{Na}_2\text{O}$ :  $663$ - $780\text{H}_2\text{O}$  was formed, which was heated under autogenous pressure in a 9 mL Teflon-lined stainless steel autoclave at  $180\text{ }^\circ\text{C}$  for 3 days. The obtained crystals were washed in distilled water and dried at room temperature overnight. The product was recovered with a yield of more than 95 % based on Al. ICP analysis of the product gave (in wt.%) Al: 18.4, P: 21.2, Na: 5.20 (calcd. Al: 18.3, P: 21.0, Na: 5.20), which was consistent with the elemental contents calculated from the molecular formula of  $[\text{Na}(\text{H}_2\text{O})_2][(\text{AlPO}_4)_3\text{OH}]$ .

**Preparation of JU93(A),  $\text{NH}_4$ -JU93, JU93(B) and  $\text{NH}_4$ -JU93(r).** JU93(A) with an identical framework topology of  $\text{AlPO}_4$ -53(C) was obtained by calcining the as-synthesized JU93 at  $400\text{ }^\circ\text{C}$  for 4 h. The  $\text{NH}_4^+$  exchanged JU93 (denoted as  $\text{NH}_4$ -JU93) was obtained by immersing 1 g of JU93 sample in 30 mL of 1 M  $\text{NH}_4\text{NO}_3$  (or  $\text{NH}_4\text{HCO}_3$ ,  $\text{CH}_3\text{COONH}_4$ ) solution at  $85\text{ }^\circ\text{C}$  for 5 h, and then washed by distilled water for several times. JU93(B) was produced by heating the  $\text{NH}_4$ -JU93 at  $230\text{ }^\circ\text{C}$  for 2 h to remove the  $\text{NH}_4^+$  ions in the channels and  $\text{OH}^-$  ions on the framework. Rehydrated  $\text{NH}_4$ -JU93 (denoted as  $\text{NH}_4$ -JU93(r)) was prepared by immersing the JU93(B) samples in 1 M  $\text{CH}_3\text{COONH}_4$  at  $85\text{ }^\circ\text{C}$  for 5 h, and then washing by distilled water for several times.

**Characterization Methods.** Powder X-ray diffraction (PXRD) data were collected on a Rigaku D/max-2550 diffractometer with Cu  $K\alpha$  radiation ( $\lambda = 1.5418\text{ \AA}$ ). The

crystal morphology was studied by field emission scanning electron microscopy (SEM) JEOL JSM-6510 using conventional sample preparation and imaging techniques. Inductively coupled plasma (ICP) analysis was performed on a Perkin-Elmer Optima 3300DV spectrometer. Elemental analysis was conducted on a Vario MICRO elemental analyzer. Thermogravimetric analysis (TGA) was carried out on a TA Q500 analyzer in air with a heating rate of 10°C min<sup>-1</sup> from RT to 800°C.

A tablet was prepared by pressing the JU93 samples on a tableting machine and calcined at 400 °C for 4 h for the electric conductivity. Electric conductivity measurement of the samples was carried out via impedance spectroscopy on a Solartron 1260 impedance analyzer over the frequency range from 0.1 Hz to 1 MHz and in the temperature range of 150–450 °C or 200–600 °C. Ionic conductivity values were calculated with  $\sigma = d/(R \times S)$ , where  $d$  denotes the sample thickness,  $S$  indicates the area of the electrodes and  $R$  is the sample resistance corresponding to the total resistance ( $R_t$ ).

N<sub>2</sub> adsorption at 77K, and CO<sub>2</sub> and CH<sub>4</sub> adsorptions at 273K for the sample of JU93(B) were performed on an apparatus of Micromeritics ASAP 2020. Before the adsorption, the sample of JU93(B) was pretreated in vacuum at 80 °C for 12 h to remove the physical adsorption of water in the holes. Specific surface area was calculated by using the Brunauer-Emmett-Teller (BET) equation.

**Structural Determination.** Suitable single crystal of JU93 with dimension of 0.41 × 0.35 × 0.12 mm<sup>3</sup> was selected for single-crystal X-ray diffraction analyses. The intensity data were collected on a Rigaku RAXIS-RAPID diffractometer with graphite-monochromated Mo K $\alpha$  radiation ( $\lambda = 0.71073$  Å) at temperature of 20±2 °C. Cell refinement and data reduction were accomplished with the SAINT processing program.<sup>1</sup> The structure of JU93 was solved in the space group  $Pca2_1$  by direct methods and refined by full matrix least-squares technique with the SHELXTL crystallographic software package.<sup>2</sup> The heaviest atoms of Al, P, Na and O could be unambiguously located. The H atoms in the structure were not added. All non-hydrogen atoms were refined anisotropically. Crystal data and refinement parameters

for the structure determination are presented in Table S1. The selected bond distances and bond angles are listed in the Table S2.

#### **Supplementary References**

- 1 SAINT, Bruker AXS Inc., 5465 East Cheryl Parkway, Madison, WI, 53711–5373, USA, 2000.
- 2 SHELXTL, Bruker AXS Inc., 5465 East Cheryl Parkway, Madison, WI, 53711–5373, USA, 2000.

**Table S1** Crystal data and structure refinement for JU93<sup>a</sup>

| compound                                                     | JU93                                                                           |
|--------------------------------------------------------------|--------------------------------------------------------------------------------|
| empirical formula                                            | Na <sub>2</sub> Al <sub>6</sub> P <sub>6</sub> O <sub>30</sub> H <sub>10</sub> |
| formula weight                                               | 883.76                                                                         |
| temperature                                                  | 293(2) K                                                                       |
| wavelength(Å)                                                | 0.71073                                                                        |
| crystal system, space group                                  | Orthorhombic, <i>Pca</i> 2 <sub>1</sub>                                        |
| unit cell dimensions                                         |                                                                                |
| <i>a</i> (Å)                                                 | 17.495(4)                                                                      |
| <i>b</i> (Å)                                                 | 10.321(2)                                                                      |
| <i>c</i> (Å)                                                 | 13.577(3)                                                                      |
| volume(Å <sup>3</sup> )                                      | 2451.4(9)                                                                      |
| <i>Z</i> , calculated density(mg/m <sup>3</sup> )            | 4, 2.395                                                                       |
| absorption coefficient(mm <sup>-1</sup> )                    | 0.824                                                                          |
| <i>F</i> (000)                                               | 1760                                                                           |
| crystal size(mm <sup>3</sup> )                               | 0.41 × 0.35 × 0.12                                                             |
| $\theta$ range(°) for data collection                        | 3–27.48                                                                        |
| limiting indices                                             | -22 ≤ <i>h</i> ≤ 22, -12 ≤ <i>k</i> ≤ 12, -17 ≤ <i>l</i> ≤ 17                  |
| reflections collected/unique                                 | 21860/5516, [ <i>R</i> (int) = 0.0345]                                         |
| completeness to $\theta$ (%)                                 | 27.48, 98.8                                                                    |
| absorption correction                                        | Empirical                                                                      |
| max and min transmission                                     | 0.9069 and 0.7278                                                              |
| refinement method                                            | full-matrix least-squares on <i>F</i> <sup>2</sup>                             |
| data/restraints/parameters                                   | 5516/1/397                                                                     |
| goodness-of-fit on <i>F</i> <sup>2</sup>                     | 1.037                                                                          |
| final <i>R</i> indices [ <i>I</i> > 2 $\sigma$ ( <i>I</i> )] | <i>R</i> <sub>1</sub> = 0.0295, <i>wR</i> <sub>2</sub> = 0.0798                |
| <i>R</i> indices (all data)                                  | <i>R</i> <sub>1</sub> = 0.0343, <i>wR</i> <sub>2</sub> = 0.0820                |
| Absolute structure parameter                                 | 0.21(11)                                                                       |
| largest diff. peak and hole (eÅ <sup>-3</sup> )              | 0.668 and -0.441                                                               |

<sup>a</sup>  $R_1 = \sum(\Delta F / \sum(F_o))$ ,  $wR_2 = (\sum[w(F_o^2 - F_c^2)]) / \sum[w(F_o^2)]^{1/2}$  and  $w = 1/\sigma^2(F_o^2)$ .

**Table S2** Selected bond lengths [Å] and angles [°] for JU93

| Selected bond lengths |          | Selected angles     |            |                        |            |
|-----------------------|----------|---------------------|------------|------------------------|------------|
| Al(1)-O(6)            | 1.780(2) | O(6)-Al(1)-O(10)    | 135.96(15) | O(16)-P(3)-O(18)       | 110.74(17) |
| Al(1)-O(10)           | 1.793(2) | O(6)-Al(1)-O(9)     | 114.52(13) | O(16)-P(3)-O(9)        | 108.56(16) |
| Al(1)-O(9)            | 1.801(3) | O(10)-Al(1)-O(9)    | 109.51(13) | O(18)-P(3)-O(9)        | 108.10(15) |
| Al(1)-O(7)            | 1.851(3) | O(6)-Al(1)-O(7)     | 90.47(11)  | O(16)-P(3)-O(17)       | 109.22(15) |
| Al(1)-O(8)            | 1.904(3) | O(10)-Al(1)-O(7)    | 88.92(11)  | O(18)-P(3)-O(17)       | 110.57(16) |
| Al(2)-O(11)           | 1.730(3) | O(9)-Al(1)-O(7)     | 90.14(13)  | O(9)-P(3)-O(17)        | 109.61(16) |
| Al(2)-O(12)           | 1.726(2) | O(6)-Al(1)-O(8)     | 86.49(12)  | O(12)#3-P(4)-O(1)      | 108.76(14) |
| Al(2)-O(26)           | 1.746(3) | O(10)-Al(1)-O(8)    | 89.61(12)  | O(12)#3-P(4)-O(19)#4   | 109.90(17) |
| Al(2)-O(17)           | 1.758(2) | O(9)-Al(1)-O(8)     | 95.91(14)  | O(1)-P(4)-O(19)#4      | 108.80(16) |
| Al(3)-O(19)           | 1.777(3) | O(7)-Al(1)-O(8)     | 173.91(14) | O(12)#3-P(4)-O(2)      | 109.77(16) |
| Al(3)-O(4)            | 1.824(3) | O(11)-Al(2)-O(12)   | 110.00(16) | O(1)-P(4)-O(2)         | 110.39(16) |
| Al(3)-O(20)           | 1.834(3) | O(11)-Al(2)-O(26)   | 105.24(15) | O(19)#4-P(4)-O(2)      | 109.20(15) |
| Al(3)-O(22)           | 1.859(2) | O(12)-Al(2)-O(26)   | 108.07(14) | O(6)-P(5)-O(4)         | 111.35(16) |
| Al(3)-O(21)           | 1.865(2) | O(11)-Al(2)-O(17)   | 109.51(15) | O(6)-P(5)-O(5)         | 111.74(14) |
| Al(4)-O(14)           | 1.797(3) | O(12)-Al(2)-O(17)   | 112.19(13) | O(4)-P(5)-O(5)         | 107.20(13) |
| Al(4)-O(16)#1         | 1.808(3) | O(26)-Al(2)-O(17)   | 111.59(14) | O(6)-P(5)-O(3)         | 110.94(15) |
| Al(4)-O(8)            | 1.833(3) | O(19)-Al(3)-O(4)    | 101.46(14) | O(4)-P(5)-O(3)         | 108.71(15) |
| Al(4)-O(15)           | 1.851(3) | O(19)-Al(3)-O(20)   | 109.61(14) | O(5)-P(5)-O(3)         | 106.70(16) |
| Al(4)-O(13)           | 1.886(3) | O(4)-Al(3)-O(20)    | 148.81(15) | O(21)-P(6)-O(10)#10    | 108.10(15) |
| Al(5)-O(24)           | 1.731(3) | O(19)-Al(3)-O(22)   | 98.01(14)  | O(21)-P(6)-O(11)#3     | 108.99(17) |
| Al(5)-O(18)           | 1.724(2) | O(4)-Al(3)-O(22)    | 90.15(12)  | O(10)#10-P(6)-O(11)#3  | 106.80(17) |
| Al(5)-O(3)#6          | 1.734(3) | O(20)-Al(3)-O(22)   | 88.23(12)  | O(21)-P(6)-O(13)#10    | 110.71(13) |
| Al(5)-O(2)#6          | 1.755(2) | O(19)-Al(3)-O(21)   | 97.85(14)  | O(10)#10-P(6)-O(13)#10 | 111.74(14) |
| Al(6)-O(20)           | 1.886(3) | O(4)-Al(3)-O(21)    | 84.21(11)  | O(11)#3-P(6)-O(13)#10  | 110.36(17) |
| Al(6)-O(1)            | 1.799(3) | O(20)-Al(3)-O(21)   | 88.86(11)  | O(3W)#4-Na(1)-O(4W)    | 111.98(14) |
| Al(6)-O(23)           | 1.797(2) | O(22)-Al(3)-O(21)   | 163.94(14) | O(3W)#4-Na(1)-O(4)#7   | 117.83(13) |
| Al(6)-O(25)#10        | 1.807(3) | O(14)-Al(4)-O(16)#4 | 102.36(14) | O(4W)-Na(1)-O(4)#7     | 115.16(12) |
| Al(6)-O(5)#7          | 1.882(3) | O(14)-Al(4)-O(8)    | 146.52(15) | O(3W)#4-Na(1)-O(23)    | 104.14(12) |
| P(1)-O(15)            | 1.516(3) | O(16)#4-Al(4)-O(8)  | 111.06(14) | O(4W)-Na(1)-O(23)      | 93.17(10)  |
| P(1)-O(23)            | 1.528(3) | O(14)-Al(4)-O(15)   | 86.65(11)  | O(4)#7-Na(1)-O(23)     | 111.14(10) |
| P(1)-O(24)            | 1.530(3) | O(16)#4-Al(4)-O(15) | 96.53(13)  | O(3W)#4-Na(1)-O(5)#7   | 101.82(14) |
| P(1)-O(22)            | 1.538(3) | O(8)-Al(4)-O(15)    | 87.62(11)  | O(4W)-Na(1)-O(5)#7     | 141.86(12) |
| P(2)-O(25)            | 1.509(3) | O(14)-Al(4)-O(13)   | 91.03(12)  | O(4)#7-Na(1)-O(5)#7    | 58.99(9)   |
| P(2)-O(7)#6           | 1.512(2) | O(16)#4-Al(4)-O(13) | 95.77(13)  | O(23)-Na(1)-O(5)#7     | 60.87(8)   |
| P(2)-O(14)            | 1.531(2) | O(8)-Al(4)-O(13)    | 87.68(12)  | O(3W)#4-Na(1)-O(21)#7  | 96.81(11)  |
| P(2)-O(26)            | 1.531(3) | O(15)-Al(4)-O(13)   | 167.69(14) | O(4W)-Na(1)-O(21)#7    | 77.47(9)   |
| P(3)-O(16)            | 1.502(3) | O(18)-Al(5)-O(24)   | 109.80(16) | O(4)#7-Na(1)-O(21)#7   | 58.45(8)   |
| P(3)-O(18)            | 1.522(2) | O(18)-Al(5)-O(3)#6  | 108.69(14) | O(23)-Na(1)-O(21)#7    | 159.00(12) |
| P(3)-O(9)             | 1.529(3) | O(24)-Al(5)-O(3)#6  | 104.31(16) | O(5)#7-Na(1)-O(21)#7   | 116.36(9)  |
| P(3)-O(17)            | 1.548(2) | O(18)-Al(5)-O(2)#6  | 112.14(13) | O(4W)#4-Na(2)-O(2W)    | 95.05(14)  |
| P(4)-O(12)#3          | 1.518(2) | O(24)-Al(5)-O(2)#6  | 109.34(15) | O(4W)#4-Na(2)-O(1W)#9  | 82.65(13)  |

|               |          |                       |            |                      |            |
|---------------|----------|-----------------------|------------|----------------------|------------|
| P(4)-O(1)     | 1.521(3) | O(3)#6-Al(5)-O(2)#6   | 112.27(14) | O(2W)-Na(2)-O(1W)#9  | 168.45(16) |
| P(4)-O(19)#4  | 1.530(3) | O(1)-Al(6)-O(23)      | 109.19(13) | O(4W)#4-Na(2)-O(5)   | 171.19(11) |
| P(4)-O(2)     | 1.538(3) | O(23)-Al(6)-O(25)#10  | 136.30(15) | O(2W)-Na(2)-O(5)     | 91.04(14)  |
| P(5)-O(6)     | 1.514(3) | O(1)-Al(6)-O(25)#10   | 114.41(13) | O(1W)#9-Na(2)-O(5)   | 92.62(13)  |
| P(5)-O(4)     | 1.521(2) | O(23)-Al(6)-O(5)#7    | 87.54(11)  | O(4W)#4-Na(2)-O(1)#2 | 124.62(10) |
| P(5)-O(5)     | 1.526(3) | O(1)-Al(6)-O(5)#7     | 89.99(13)  | O(2W)-Na(2)-O(1)#2   | 85.49(13)  |
| P(5)-O(3)     | 1.553(3) | O(25)#10-Al(6)-O(5)#7 | 89.59(12)  | O(1W)#9-Na(2)-O(1)#2 | 86.53(13)  |
| P(6)-O(21)    | 1.513(2) | O(23)-Al(6)-O(20)     | 90.77(12)  | O(5)-Na(2)-O(1)#2    | 62.16(9)   |
| P(6)-O(11)#3  | 1.534(3) | O(1)-Al(6)-O(20)      | 96.79(14)  | O(4W)#4-Na(2)-O(3)   | 114.94(10) |
| P(6)-O(13)#10 | 1.536(3) | O(25)#10-Al(6)-O(20)  | 87.09(13)  | O(2W)-Na(2)-O(3)     | 98.70(13)  |
| P(6)-O(10)#10 | 1.533(3) | O(5)#7-Al(6)-O(20)    | 173.19(15) | O(1W)#9-Na(2)-O(3)   | 92.51(14)  |
| Na(1)-O(3W)#4 | 2.301(4) | O(15)-P(1)-O(23)      | 108.03(15) | O(5)-Na(2)-O(3)      | 57.64(9)   |
| Na(1)-O(4W)   | 2.320(3) | O(15)-P(1)-O(24)      | 110.46(17) | O(1)#2-Na(2)-O(3)    | 119.69(11) |
| Na(1)-O(4)#7  | 2.347(3) | O(23)-P(1)-O(24)      | 107.02(17) |                      |            |
| Na(1)-O(23)   | 2.400(3) | O(15)-P(1)-O(22)      | 109.71(13) |                      |            |
| Na(1)-O(5)#7  | 2.612(3) | O(23)-P(1)-O(22)      | 111.56(15) |                      |            |
| Na(1)-O(21)#7 | 2.683(3) | O(24)-P(1)-O(22)      | 110.01(17) |                      |            |
| Na(2)-O(3)    | 2.616(3) | O(25)-P(2)-O(7)#1     | 111.54(14) |                      |            |
| Na(2)-O(1W)#9 | 2.373(4) | O(25)-P(2)-O(14)      | 109.52(16) |                      |            |
| Na(2)-O(2W)   | 2.312(4) | O(7)#1-P(2)-O(14)     | 110.13(13) |                      |            |
| Na(2)-O(4W)#4 | 2.309(3) | O(25)-P(2)-O(26)      | 109.57(15) |                      |            |
| Na(2)-O(5)    | 2.504(3) | O(7)#1-P(2)-O(26)     | 107.55(16) |                      |            |
| Na(2)-O(1)#2  | 2.538(3) | O(14)-P(2)-O(26)      | 108.46(15) |                      |            |

Symmetry transformations used to generate equivalent atoms:

#1  $x-1/2, -y-1, z$ ; #2  $x+1/2, -y, z$ ; #3  $-x-1/2, y+1, z-1/2$ ; #4  $-x-1/2, y, z-1/2$ ; #5  $x, y-1, z$ ; #6  $-x-1/2, y, z+1/2$ ; #7  $x-1/2, -y, z$ ; #8  $-x-1/2, y-1, z+1/2$ ; #9  $x+1/2, -y-1, z$ ; #10  $x, y+1, z$

**Table S3** Compositional analyses of JU93 samples ion-exchanged by different ammonium salts

| Sample                | Ammonium salts<br>used for<br>ion-exchange | Na <sup>+</sup> content<br>(wt%) | Ncontent<br>(wt%) | Degree of Na <sup>+</sup><br>ion-exchanged (%) <sup>a</sup> |
|-----------------------|--------------------------------------------|----------------------------------|-------------------|-------------------------------------------------------------|
| JU93                  | --                                         | 5.20                             | --                | --                                                          |
|                       | CH <sub>3</sub> COONH <sub>4</sub>         | 0.288                            | 3.20              | 94                                                          |
| NH <sub>4</sub> -JU93 | NH <sub>4</sub> NO <sub>3</sub>            | 0.556                            | 3.08              | 89                                                          |
|                       | NH <sub>4</sub> HCO <sub>3</sub>           | 1.03                             | 2.89              | 80                                                          |

<sup>a</sup> the degree of Na<sup>+</sup> ion-exchange is calculated based on the Na<sup>+</sup> content.



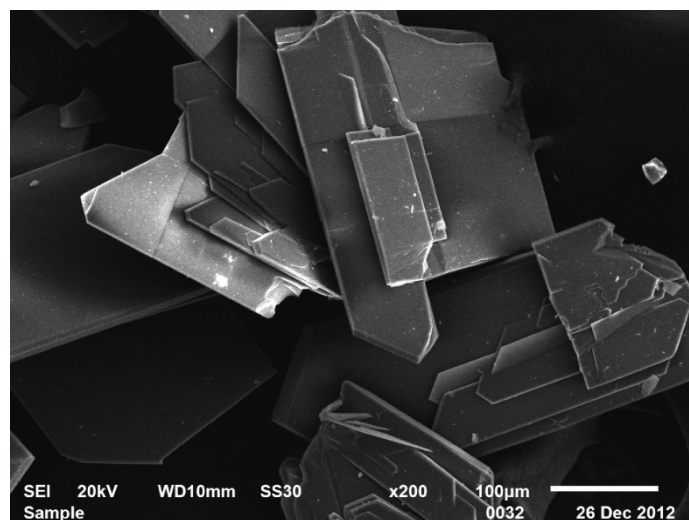

**Figure S1.** SEM image of JU93.

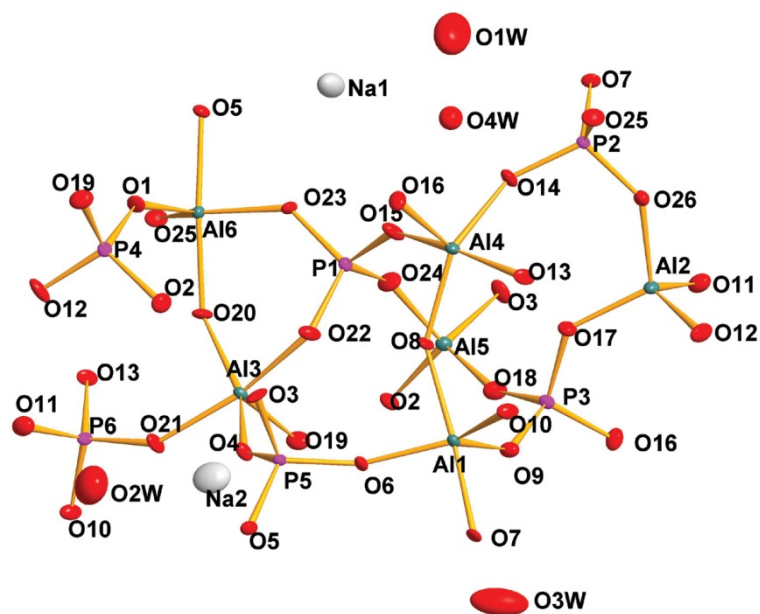

**Figure S2.** Thermal ellipsoids given at 50% probability, showing the atomic labeling scheme of JU93.

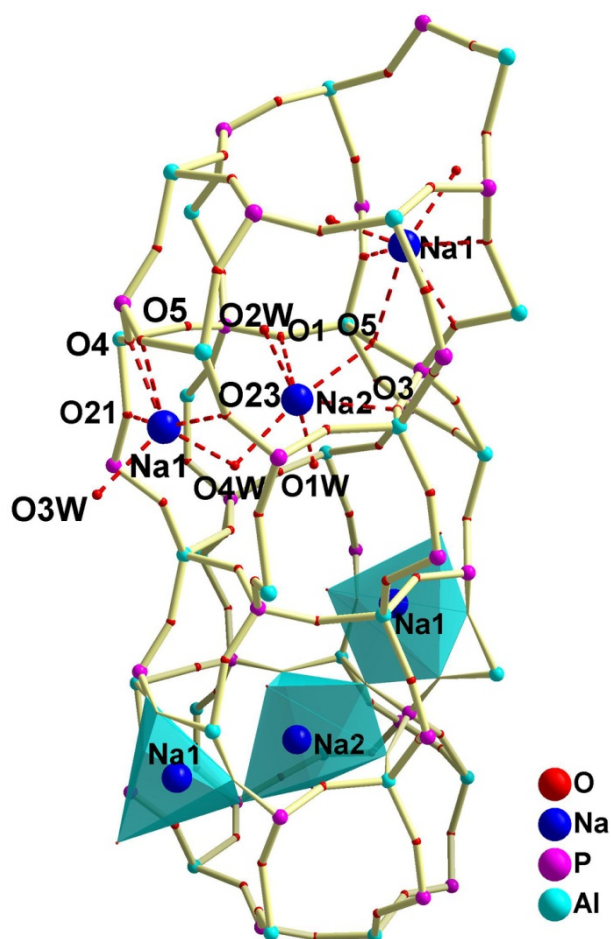

**Figure S3.** Coordination geometry of Na<sup>+</sup> ions in JU93.

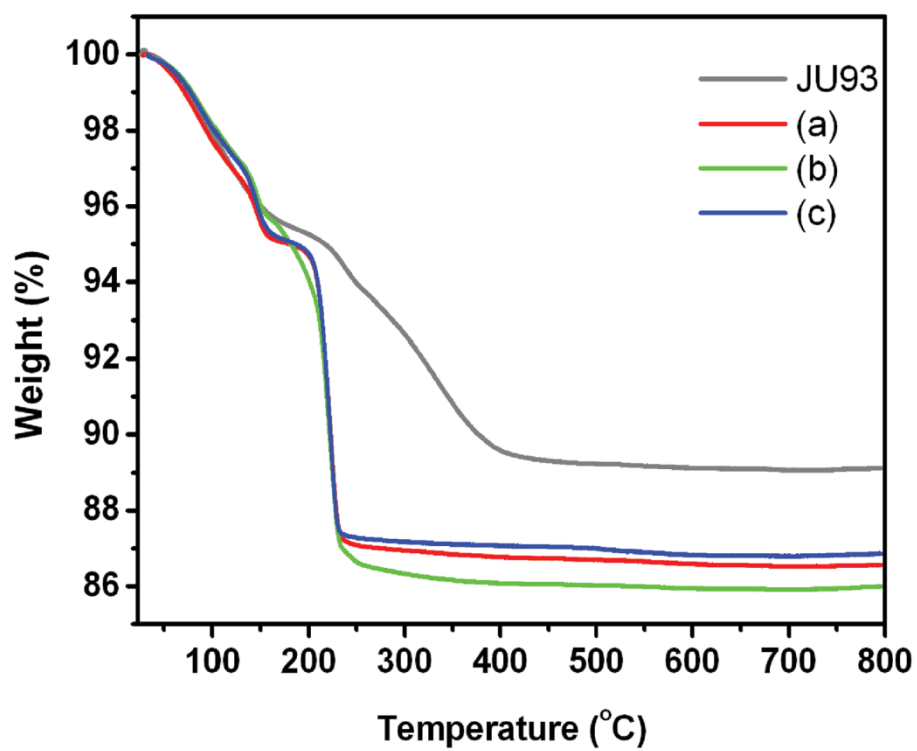

**Figure S4.** TGA curves of as-synthesized JU93 and  $\text{NH}_4$ -JU93 exchanged by (a)  $\text{NH}_4\text{NO}_3$ , (b)  $\text{NH}_4\text{HCO}_3$  and (c)  $\text{CH}_3\text{COONH}_4$ , respectively.

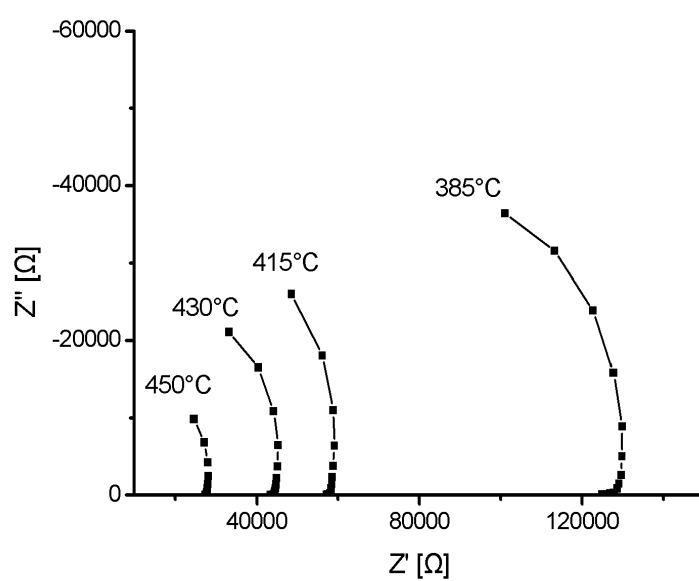

(a)

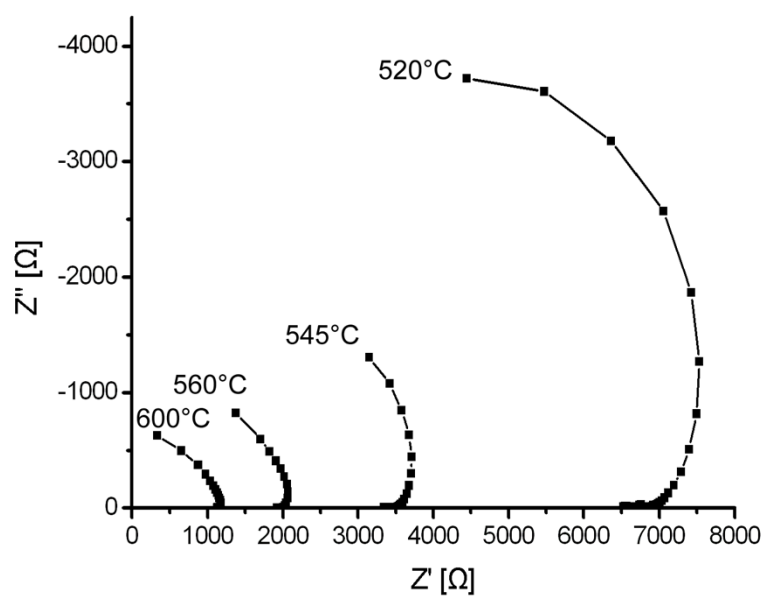

(b)

**Figure S5.** Impedance spectra of (a) JU93(A) and (b) JU93-550 under different temperatures.

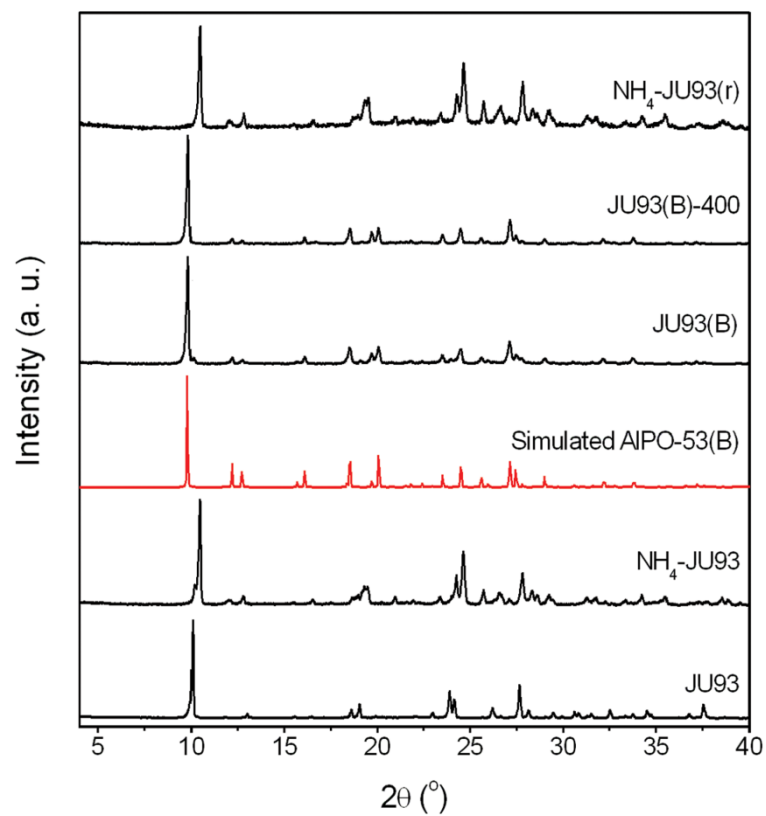

**Figure S6.** Experimental PXRD patterns of  $\text{NH}_4\text{-JU93}$ ,  $\text{JU93(B)}$ , the calcined  $\text{JU93(B)}$  at  $400^\circ\text{C}$  ( $\text{JU93(B)-400}$ ) and  $\text{NH}_4\text{-JU93(r)}$ , compared with the as-synthesized  $\text{JU93}$  and the simulated  $\text{AlPO-53(B)}$ .

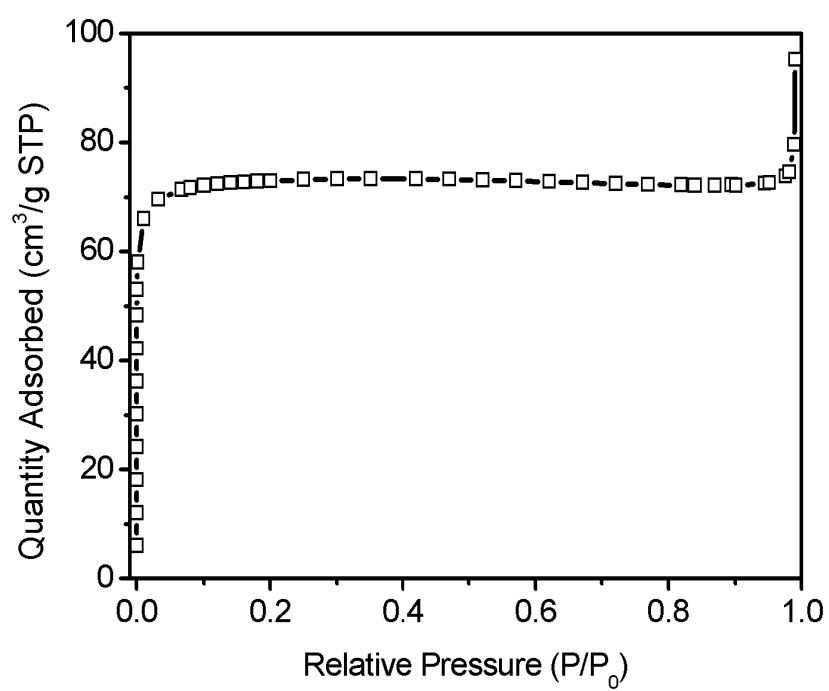

**Figure S7.** Nitrogen adsorption isotherm of JU93(B).
